# Supplementary material
Source: PubMed Central journal article supplement (PMC7148193)
Supplement: NIHMS1539782-supplement-Supplemental_Data_File__doc__pdf__etc__.pdf [file NIHMS1539782-supplement-Supplemental_Data_File__doc__pdf__etc__.pdf]

## SUPPLEMENTAL DIGITAL CONTENT

**Table I. Admitting Specialty Categorization based on Veterans Health Administration Bed Section Designations in Fiscal Year 2013**

| Specialty Bed Section                        | Admissions*<br>(n = 469,082) |        |
|----------------------------------------------|------------------------------|--------|
| Medical                                      | 314,491                      | (67.0) |
| Cardiac Intensive Care Unit                  | 2,993                        | (0.6)  |
| Cardiac Step Down Unit                       | 1,848                        | (0.4)  |
| Cardiology                                   | 8,258                        | (1.8)  |
| ED Observation                               | 66                           | (0.0)  |
| Epilepsy Center                              | 43                           | (0.0)  |
| Gastroenterology                             | 618                          | (0.1)  |
| GEM Acute Medicine                           | 618                          | (0.1)  |
| General Medicine (Acute)                     | 224,690                      | (47.9) |
| Hematology/Oncology                          | 2,493                        | (0.5)  |
| Medical Intensive Care Unit                  | 20,632                       | (4.4)  |
| Medical Observation                          | 15,889                       | (3.4)  |
| Medical Step Down                            | 5,112                        | (1.1)  |
| Metabolic                                    | 2,527                        | (0.5)  |
| Neurology                                    | 5,524                        | (1.2)  |
| Neurology Observation                        | 146                          | (0.0)  |
| Pulmonary                                    | 450                          | (0.1)  |
| Telemetry                                    | 22,584                       | (4.8)  |
| Psychiatric                                  | 64,083                       | (13.7) |
| Alcohol Dependence Treatment Unit            | 646                          | (0.1)  |
| Evaluation/Brief Treatment PTSD Unit (EBTPU) | 21                           | (0.0)  |
| GEM Psychiatric Beds                         | 217                          | (0.0)  |
| General Intermediate Psychiatry              | 1,333                        | (0.3)  |
| High Intensity General Psychiatry            | 61,477                       | (13.1) |
| Psychiatric Observation                      | 88                           | (0.0)  |
| Substance Abuse Treatment Unit               | 301                          | (0.1)  |
| Surgical                                     | 90,508                       | (19.3) |
| Cardiac Surgery                              | 766                          | (0.2)  |
| Ear, Nose, Throat (ENT)                      | 2,295                        | (0.5)  |
| General Surgery                              | 26,853                       | (5.7)  |
| Neurosurgery                                 | 4,872                        | (1.0)  |
| Obstetrics/Gynecology                        | 375                          | (0.1)  |
| Ophthalmology                                | 187                          | (0.0)  |
| Oral Surgery                                 | 142                          | (0.0)  |
| Orthopedic                                   | 15,525                       | (3.3)  |
| Plastic Surgery                              | 766                          | (0.2)  |
| Podiatry                                     | 648                          | (0.1)  |
| Surgical Intensive Care Unit                 | 12,650                       | (2.7)  |
| Surgical Observation                         | 4,071                        | (0.9)  |
| Surgical Step Down                           | 2,389                        | (0.5)  |
| Thoracic Surgery                             | 2,925                        | (0.6)  |
| Transplantation                              | 204                          | (0.0)  |
| Urology                                      | 8,773                        | (1.9)  |
| Vascular                                     | 7,067                        | (1.5)  |

GEM = Geriatric Evaluation & Management, PTSD = Post-traumatic Stress Disorder

\*Reported as No. (%)

**eTable 2. Characteristics of Hospitalizations in the Veterans Health Administration during Fiscal Year 2013**

|                                               | <b>VHA<br/>Hospitalizations*<br/>(n = 469,082)</b> |        |
|-----------------------------------------------|----------------------------------------------------|--------|
| Facility Complexity Level                     |                                                    |        |
| 1a—highest                                    | 262,024                                            | (55.9) |
| 1b—high                                       | 91,932                                             | (19.6) |
| 1c—mid-high                                   | 77,910                                             | (16.6) |
| 2—medium                                      | 37,216                                             | (7.9)  |
| Intensive care                                |                                                    |        |
| No                                            | 425,382                                            | (90.7) |
| Yes                                           | 43,700                                             | (9.3)  |
| Admitting specialty                           |                                                    |        |
| Medical                                       | 314,491                                            | (67.0) |
| Psychiatric                                   | 64,083                                             | (13.7) |
| Surgical                                      | 90,508                                             | (19.3) |
| Diagnoses                                     |                                                    |        |
| Alcohol-related disorder                      | 64,725                                             | (13.8) |
| Other substance use condition                 | 46,987                                             | (10.0) |
| Mental health disorder                        | 149,985                                            | (32.0) |
| Suicide attempt                               | 1,346                                              | (0.3)  |
| Seizure                                       | 16,031                                             | (3.4)  |
| Cerebrovascular disease                       | 30,409                                             | (6.5)  |
| Myocardial infarction                         | 23,398                                             | (5.0)  |
| Congestive heart failure                      | 73,071                                             | (15.6) |
| Cardiac dysrhythmia                           | 96,145                                             | (20.5) |
| Chronic obstructive pulmonary disease         | 93,866                                             | (20.0) |
| Pneumonia                                     | 37,679                                             | (8.0)  |
| Sepsis/shock                                  | 35,117                                             | (7.5)  |
| Gastrointestinal tract disorder               | 156,611                                            | (33.4) |
| Liver injury                                  | 52,481                                             | (11.2) |
| Pancreaticobiliary disease                    | 19,787                                             | (4.2)  |
| Kidney injury                                 | 129,478                                            | (27.6) |
| Diabetes mellitus                             | 154,674                                            | (33.0) |
| Nutrition, electrolyte, or acid-base disorder | 123,647                                            | (26.4) |
| Malignancy                                    | 63,044                                             | (13.4) |
| Musculoskeletal or soft tissue disorder       | 176,832                                            | (37.7) |
| Trauma                                        | 45,573                                             | (9.7)  |

VHA = Veterans Health Administration

\*Reported as No. (%)

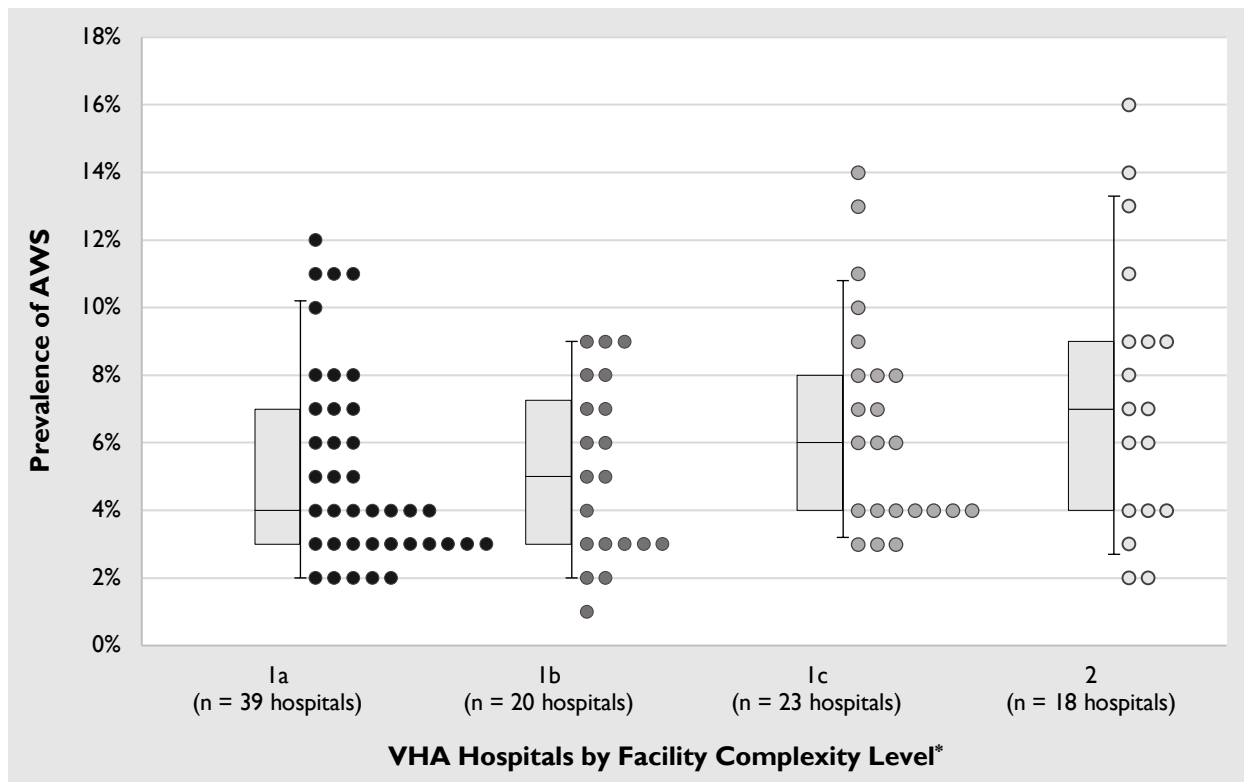

**eFigure 1. Hospital prevalence of Alcohol Withdrawal Syndrome in the Veterans Health Administration during Fiscal Year 2013 by Facility Complexity Level**

AWS = Alcohol Withdrawal Syndrome

VHA = Veterans Health Administration

Each hospital is represented by a circle corresponding to AWS prevalence

\*Facility Complexity Level: 1a—highest complexity, 1b—high complexity, 1c—mid-high complexity, 2—medium complexity; categories are mutually exclusive (n = 100 hospitals)

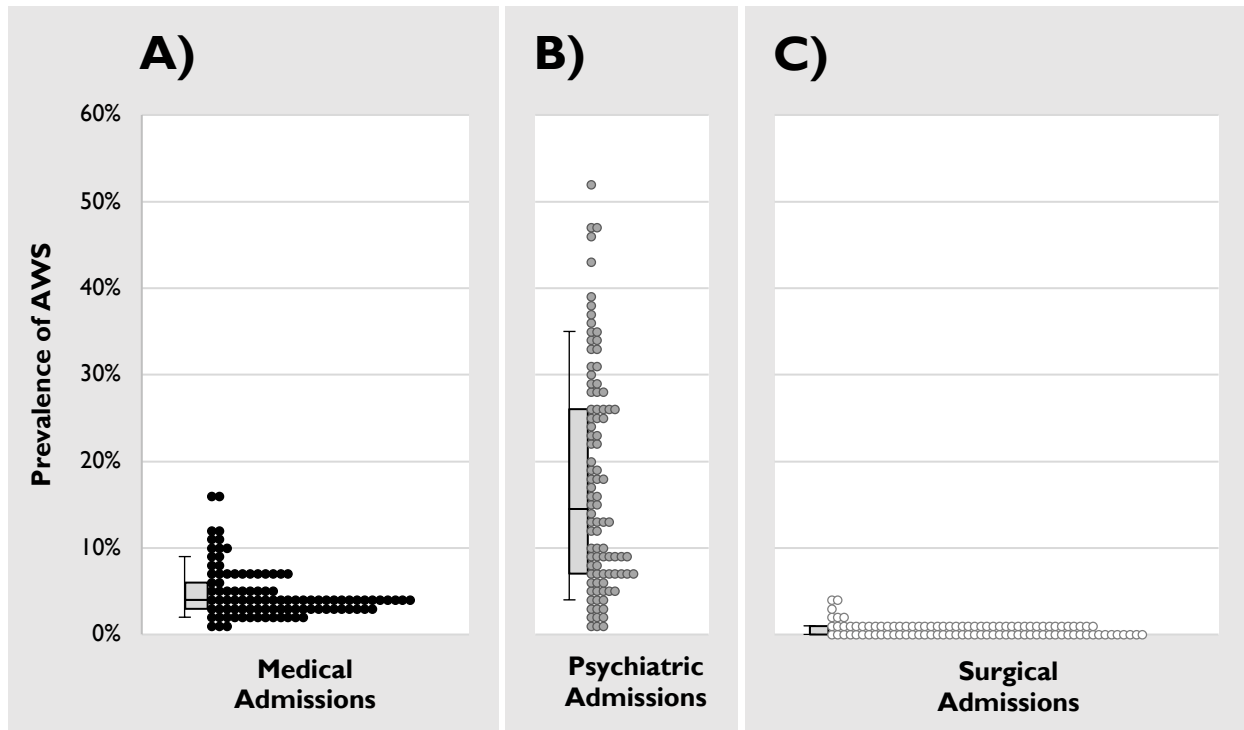

**Figure 2. Prevalence of Alcohol Withdrawal Syndrome Among A) Medical, B) Psychiatric, and C) Surgical Admissions to Hospitals in the Veterans Health Administration during Fiscal Year 2013**

AWS = Alcohol Withdrawal Syndrome

Each hospital is represented by a circle corresponding to AWS prevalence; all hospitals (n = 100) had medical and surgical admissions (panel A and C); 6 hospitals did not have Psychiatric admissions (n = 94 hospitals, panel B)
